# Supplementary material for: Validity of screening instruments for the detection of dementia and mild cognitive impairment in hospital inpatients: A systematic review of diagnostic accuracy studies
Source: PubMed Central journal article supplement (PMC6657852; doi:10.1371/journal.pone.0219569), 2019-07-25
Supplement: pone.0219569.s001.pdf [file pone.0219569.s001.pdf]

# S1. Appendix

## Search strategy for PubMed

| <b>SETTING</b>      |                                                                                     |          |                                                                                                                                                                                                                                                                                                                                                                                                                                                                                                                                                                                                                                                                                                                                                                                                                                                                                                                                                                                                                                                                                                                                                                                                                                                                                                                                                                                                                                                            |
|---------------------|-------------------------------------------------------------------------------------|----------|------------------------------------------------------------------------------------------------------------------------------------------------------------------------------------------------------------------------------------------------------------------------------------------------------------------------------------------------------------------------------------------------------------------------------------------------------------------------------------------------------------------------------------------------------------------------------------------------------------------------------------------------------------------------------------------------------------------------------------------------------------------------------------------------------------------------------------------------------------------------------------------------------------------------------------------------------------------------------------------------------------------------------------------------------------------------------------------------------------------------------------------------------------------------------------------------------------------------------------------------------------------------------------------------------------------------------------------------------------------------------------------------------------------------------------------------------------|
| Number              | Search Term                                                                         | Findings |                                                                                                                                                                                                                                                                                                                                                                                                                                                                                                                                                                                                                                                                                                                                                                                                                                                                                                                                                                                                                                                                                                                                                                                                                                                                                                                                                                                                                                                            |
| 1                   | Aged[MeSH Terms]                                                                    | 2395350  |                                                                                                                                                                                                                                                                                                                                                                                                                                                                                                                                                                                                                                                                                                                                                                                                                                                                                                                                                                                                                                                                                                                                                                                                                                                                                                                                                                                                                                                            |
| 2                   | Inpatients[MeSH Terms]                                                              | 6786     |                                                                                                                                                                                                                                                                                                                                                                                                                                                                                                                                                                                                                                                                                                                                                                                                                                                                                                                                                                                                                                                                                                                                                                                                                                                                                                                                                                                                                                                            |
| 3                   | Hospitalization[MeSH Terms]                                                         | 79284    |                                                                                                                                                                                                                                                                                                                                                                                                                                                                                                                                                                                                                                                                                                                                                                                                                                                                                                                                                                                                                                                                                                                                                                                                                                                                                                                                                                                                                                                            |
| 4                   | Hospitals [MeSH Terms]                                                              | 38484    |                                                                                                                                                                                                                                                                                                                                                                                                                                                                                                                                                                                                                                                                                                                                                                                                                                                                                                                                                                                                                                                                                                                                                                                                                                                                                                                                                                                                                                                            |
| 5                   | Inpatient[tw] OR Inpatients[tw]                                                     | 31741    |                                                                                                                                                                                                                                                                                                                                                                                                                                                                                                                                                                                                                                                                                                                                                                                                                                                                                                                                                                                                                                                                                                                                                                                                                                                                                                                                                                                                                                                            |
| 6                   | Hospitalization[tw]                                                                 | 57873    |                                                                                                                                                                                                                                                                                                                                                                                                                                                                                                                                                                                                                                                                                                                                                                                                                                                                                                                                                                                                                                                                                                                                                                                                                                                                                                                                                                                                                                                            |
| 7                   | Hospitals[tw] OR Hospital[tw]                                                       | 265366   |                                                                                                                                                                                                                                                                                                                                                                                                                                                                                                                                                                                                                                                                                                                                                                                                                                                                                                                                                                                                                                                                                                                                                                                                                                                                                                                                                                                                                                                            |
| 8                   | Preoperative Period[MeSH Terms]                                                     | 3056     |                                                                                                                                                                                                                                                                                                                                                                                                                                                                                                                                                                                                                                                                                                                                                                                                                                                                                                                                                                                                                                                                                                                                                                                                                                                                                                                                                                                                                                                            |
| 9                   | Preoperative Care[MeSH Terms]                                                       | 16724    |                                                                                                                                                                                                                                                                                                                                                                                                                                                                                                                                                                                                                                                                                                                                                                                                                                                                                                                                                                                                                                                                                                                                                                                                                                                                                                                                                                                                                                                            |
| 10                  | Elective Surgical Procedures[MeSH Terms]                                            | 5151     |                                                                                                                                                                                                                                                                                                                                                                                                                                                                                                                                                                                                                                                                                                                                                                                                                                                                                                                                                                                                                                                                                                                                                                                                                                                                                                                                                                                                                                                            |
| 11                  | 1 AND (2 – 10 (OR))                                                                 | 333855   | ((Inpatients[MeSH Terms] OR Hospitalization[MeSH Terms] OR Hospitals [MeSH Terms] OR Inpatient[tw] OR Inpatients[tw] OR Hospitalization[tw] OR Hospitals[tw] OR Hospital[tw] OR Preoperative Period[MeSH Terms] OR Preoperative Care[MeSH Terms] OR Elective Surgical Procedures[MeSH Terms])) AND Aged[MeSH Terms]                                                                                                                                                                                                                                                                                                                                                                                                                                                                                                                                                                                                                                                                                                                                                                                                                                                                                                                                                                                                                                                                                                                                        |
| <b>DISEASE</b>      |                                                                                     |          |                                                                                                                                                                                                                                                                                                                                                                                                                                                                                                                                                                                                                                                                                                                                                                                                                                                                                                                                                                                                                                                                                                                                                                                                                                                                                                                                                                                                                                                            |
| Number              | Search Term                                                                         | Findings |                                                                                                                                                                                                                                                                                                                                                                                                                                                                                                                                                                                                                                                                                                                                                                                                                                                                                                                                                                                                                                                                                                                                                                                                                                                                                                                                                                                                                                                            |
| 1                   | Dementia[MeSH Terms]                                                                | 62443    |                                                                                                                                                                                                                                                                                                                                                                                                                                                                                                                                                                                                                                                                                                                                                                                                                                                                                                                                                                                                                                                                                                                                                                                                                                                                                                                                                                                                                                                            |
| 2                   | Cognition Disorders[MeSH Terms]                                                     | 28962    |                                                                                                                                                                                                                                                                                                                                                                                                                                                                                                                                                                                                                                                                                                                                                                                                                                                                                                                                                                                                                                                                                                                                                                                                                                                                                                                                                                                                                                                            |
| 3                   | cognition[Title] OR cognitive[Title] OR dementia[Title] OR Alzheimer*[Title]        | 61238    |                                                                                                                                                                                                                                                                                                                                                                                                                                                                                                                                                                                                                                                                                                                                                                                                                                                                                                                                                                                                                                                                                                                                                                                                                                                                                                                                                                                                                                                            |
| 4                   | 1 – 3 (OR)                                                                          | 86042    | (Dementia[MeSH Terms] OR Cognition Disorders[MeSH Terms] OR cognition[Title] OR cognitive[Title] OR dementia[Title] OR Alzheimer*[Title])                                                                                                                                                                                                                                                                                                                                                                                                                                                                                                                                                                                                                                                                                                                                                                                                                                                                                                                                                                                                                                                                                                                                                                                                                                                                                                                  |
| <b>OUTCOME</b>      |                                                                                     |          |                                                                                                                                                                                                                                                                                                                                                                                                                                                                                                                                                                                                                                                                                                                                                                                                                                                                                                                                                                                                                                                                                                                                                                                                                                                                                                                                                                                                                                                            |
| Number              | Search Term                                                                         | Findings |                                                                                                                                                                                                                                                                                                                                                                                                                                                                                                                                                                                                                                                                                                                                                                                                                                                                                                                                                                                                                                                                                                                                                                                                                                                                                                                                                                                                                                                            |
| 1                   | Sensitivity and specificity[MeSH Terms]                                             | 144745   |                                                                                                                                                                                                                                                                                                                                                                                                                                                                                                                                                                                                                                                                                                                                                                                                                                                                                                                                                                                                                                                                                                                                                                                                                                                                                                                                                                                                                                                            |
| 2                   | Predictive value of tests[MeSH Terms]                                               | 73030    |                                                                                                                                                                                                                                                                                                                                                                                                                                                                                                                                                                                                                                                                                                                                                                                                                                                                                                                                                                                                                                                                                                                                                                                                                                                                                                                                                                                                                                                            |
| 3                   | Validation[tw] OR Validate[tw] OR validity[tw]                                      | 63206    |                                                                                                                                                                                                                                                                                                                                                                                                                                                                                                                                                                                                                                                                                                                                                                                                                                                                                                                                                                                                                                                                                                                                                                                                                                                                                                                                                                                                                                                            |
| 4                   | Psychometrics[MeSH Terms]                                                           | 17329    |                                                                                                                                                                                                                                                                                                                                                                                                                                                                                                                                                                                                                                                                                                                                                                                                                                                                                                                                                                                                                                                                                                                                                                                                                                                                                                                                                                                                                                                            |
| 5                   | Prevalence[MeSH Terms]                                                              | 73523    |                                                                                                                                                                                                                                                                                                                                                                                                                                                                                                                                                                                                                                                                                                                                                                                                                                                                                                                                                                                                                                                                                                                                                                                                                                                                                                                                                                                                                                                            |
| 6                   | 1- 5 (OR)                                                                           | 268129   | (Sensitivity and specificity[MeSH Terms] OR Predictive value of tests[MeSH Terms] OR Validation[tw] OR Validate[tw] OR validity[tw] OR Psychometrics[MeSH Terms] OR Prevalence[MeSH Terms])                                                                                                                                                                                                                                                                                                                                                                                                                                                                                                                                                                                                                                                                                                                                                                                                                                                                                                                                                                                                                                                                                                                                                                                                                                                                |
| <b>INTERVENTION</b> |                                                                                     |          |                                                                                                                                                                                                                                                                                                                                                                                                                                                                                                                                                                                                                                                                                                                                                                                                                                                                                                                                                                                                                                                                                                                                                                                                                                                                                                                                                                                                                                                            |
| Number              | Search Term                                                                         | Findings |                                                                                                                                                                                                                                                                                                                                                                                                                                                                                                                                                                                                                                                                                                                                                                                                                                                                                                                                                                                                                                                                                                                                                                                                                                                                                                                                                                                                                                                            |
| 1                   | Diagnostic tests, routine[MeSH Terms]                                               | 1823     |                                                                                                                                                                                                                                                                                                                                                                                                                                                                                                                                                                                                                                                                                                                                                                                                                                                                                                                                                                                                                                                                                                                                                                                                                                                                                                                                                                                                                                                            |
| 2                   | Mass screening[MeSH Terms]                                                          | 22235    |                                                                                                                                                                                                                                                                                                                                                                                                                                                                                                                                                                                                                                                                                                                                                                                                                                                                                                                                                                                                                                                                                                                                                                                                                                                                                                                                                                                                                                                            |
| 3                   | Early diagnosis[MeSH Terms]                                                         | 11961    |                                                                                                                                                                                                                                                                                                                                                                                                                                                                                                                                                                                                                                                                                                                                                                                                                                                                                                                                                                                                                                                                                                                                                                                                                                                                                                                                                                                                                                                            |
| 4                   | Neuropsychological Tests[MeSH Terms]                                                | 50210    |                                                                                                                                                                                                                                                                                                                                                                                                                                                                                                                                                                                                                                                                                                                                                                                                                                                                                                                                                                                                                                                                                                                                                                                                                                                                                                                                                                                                                                                            |
| 5                   | Geriatric Assessment[MeSH Terms]                                                    | 21583    |                                                                                                                                                                                                                                                                                                                                                                                                                                                                                                                                                                                                                                                                                                                                                                                                                                                                                                                                                                                                                                                                                                                                                                                                                                                                                                                                                                                                                                                            |
| 6                   | Intelligence Tests[MeSH Terms]                                                      | 2488     |                                                                                                                                                                                                                                                                                                                                                                                                                                                                                                                                                                                                                                                                                                                                                                                                                                                                                                                                                                                                                                                                                                                                                                                                                                                                                                                                                                                                                                                            |
| 7                   | Psychiatric Status Rating Scales[MeSH Terms]                                        | 23256    |                                                                                                                                                                                                                                                                                                                                                                                                                                                                                                                                                                                                                                                                                                                                                                                                                                                                                                                                                                                                                                                                                                                                                                                                                                                                                                                                                                                                                                                            |
| 8                   | Screen[tw] OR Screening[tw]                                                         | 80365    |                                                                                                                                                                                                                                                                                                                                                                                                                                                                                                                                                                                                                                                                                                                                                                                                                                                                                                                                                                                                                                                                                                                                                                                                                                                                                                                                                                                                                                                            |
| 9                   | test[Title]                                                                         | 16192    |                                                                                                                                                                                                                                                                                                                                                                                                                                                                                                                                                                                                                                                                                                                                                                                                                                                                                                                                                                                                                                                                                                                                                                                                                                                                                                                                                                                                                                                            |
| 10                  | tests[Title]                                                                        | 5071     |                                                                                                                                                                                                                                                                                                                                                                                                                                                                                                                                                                                                                                                                                                                                                                                                                                                                                                                                                                                                                                                                                                                                                                                                                                                                                                                                                                                                                                                            |
| 11                  | Tool[Title]                                                                         | 5332     |                                                                                                                                                                                                                                                                                                                                                                                                                                                                                                                                                                                                                                                                                                                                                                                                                                                                                                                                                                                                                                                                                                                                                                                                                                                                                                                                                                                                                                                            |
| 12                  | Tools[Title]                                                                        | 1087     |                                                                                                                                                                                                                                                                                                                                                                                                                                                                                                                                                                                                                                                                                                                                                                                                                                                                                                                                                                                                                                                                                                                                                                                                                                                                                                                                                                                                                                                            |
| 13                  | Measures[Title]                                                                     | 5942     |                                                                                                                                                                                                                                                                                                                                                                                                                                                                                                                                                                                                                                                                                                                                                                                                                                                                                                                                                                                                                                                                                                                                                                                                                                                                                                                                                                                                                                                            |
| 14                  | Measure[Title]                                                                      | 4226     |                                                                                                                                                                                                                                                                                                                                                                                                                                                                                                                                                                                                                                                                                                                                                                                                                                                                                                                                                                                                                                                                                                                                                                                                                                                                                                                                                                                                                                                            |
| 15                  | Instrument[Title]                                                                   | 1939     |                                                                                                                                                                                                                                                                                                                                                                                                                                                                                                                                                                                                                                                                                                                                                                                                                                                                                                                                                                                                                                                                                                                                                                                                                                                                                                                                                                                                                                                            |
| 16                  | Instruments[Title]                                                                  | 871      |                                                                                                                                                                                                                                                                                                                                                                                                                                                                                                                                                                                                                                                                                                                                                                                                                                                                                                                                                                                                                                                                                                                                                                                                                                                                                                                                                                                                                                                            |
| 17                  | Assessment[Title]                                                                   | 38332    |                                                                                                                                                                                                                                                                                                                                                                                                                                                                                                                                                                                                                                                                                                                                                                                                                                                                                                                                                                                                                                                                                                                                                                                                                                                                                                                                                                                                                                                            |
| 18                  | Detection[Title]                                                                    | 23021    |                                                                                                                                                                                                                                                                                                                                                                                                                                                                                                                                                                                                                                                                                                                                                                                                                                                                                                                                                                                                                                                                                                                                                                                                                                                                                                                                                                                                                                                            |
| 19                  | 1 – 18 (OR) OR instruments recommended in primary care dementia practice guidelines | 232501   | ((5 word test[tw] OR Five word test[tw] OR 6 item cognitive impairment test[tw] OR Six item cognitive impairment test[tw] OR 6CIT[tw] OR 7 Minute Screen[tw] OR Seven Minute Screen[tw] OR Abbreviated mental test[tw] OR Blessed Orientation Memory Concentration Test[tw] OR BOMC[tw] OR BrainCheck[tw] OR Clock Drawing test[tw] OR Elderly Cognitive Assessment Questionnaire[tw] OR ECAQ[tw] OR ECDR[tw] OR Expanded Clinical Dementia Rating[tw] OR Frontal Assessment Battery[tw] OR GPCOG[tw] OR General Practitioner Assessment of Cognition [tw] OR Hasegawa Dementia Scale[tw] OR Mattis Dementia Rating Scale[tw] OR Mini Cog[tw] OR MiniCog[tw] OR MMSE[tw] OR Mini-Mental State Examination[tw] OR Modified MMSE[tw] OR Modified-Mini-Mental State Examination[tw] OR MOCA[tw] OR Montreal Cognitive Assessment[tw] OR Saint Louis University Mental Status Examination[tw] OR St. Louis University Mental Status Examination[tw] OR SLUMS[tw])) OR (Diagnostic tests, routine[MeSH Terms] OR Mass screening[MeSH Terms] OR Early diagnosis[MeSH Terms] OR Neuropsychological Tests[MeSH Terms] OR Geriatric Assessment[MeSH Terms] OR Intelligence Tests[MeSH Terms] OR Psychiatric Status Rating Scales[MeSH Terms] OR Screen[tw] OR Screening[tw] OR test[Title] OR tests[Title] OR Tool[Title] OR Tools[Title] OR Measures[Title] OR Measure[Title] OR Instrument[Title] OR Instruments[Title] OR Assessment[Title] OR Detection[Title]) |

Instruments recommended for dementia screening in Primary Care setting were extracted from the following Dementia Practice Guidelines, if the administration time < 15 min, included more than one cognitive domain and were not only targeting informants.

| <b>Dementia Practice Guideline</b>                                                | <b>Recommended instruments (brief cog. testing instrument)</b>                                                                                                                                               |
|-----------------------------------------------------------------------------------|--------------------------------------------------------------------------------------------------------------------------------------------------------------------------------------------------------------|
| Ministry of Health Singapore (2013)                                               | Elderly Cognitive Assessment Questionnaire, Abbreviated Mental Test, AD8, Mini Mental State Examination, Frontal Assessment Battery, Montreal Cognitive Assessment                                           |
| European Federation of Neurological Sciences (2012)                               | Mini-Mental State Examination (MMSE), 7min, Addenbrooke's cognitive examination revised(ACE-R), MOCA, Mattis Dementia Rating Scale (MDRS), Clock Drawing test (CDT), 5 word test,                            |
| Consensus 2012 - Diagnosis and Treatment of Patients with Dementia in Switzerland | Mini-Mental Status Examination, Clock Drawing Test, MOCA, Minicog, BRAINCHECK,                                                                                                                               |
| National Institute for Health and Clinical Excellence (2011)                      | MMSE, 6-item Cognitive Impairment Test (6-CIT), General Practitioner Assessment of Cognition (GPCOG), 7-Minute Screen                                                                                        |
| Clinical Research Centre for Dementia of South Korea (2011)                       | Mini-Mental State Examination, Expanded Clinical Dementia Rating, Global Deterioration Scale, Modified-MMSE, Hasegawa Dementia Scale, 7-Minute Screen Test, Montreal Cognitive Assessment                    |
| California Workgroup on Guidelines (2011)                                         | Blessed Orientation Memory Concentration Test (BOMC), Cognitive Assessment Screening Instrument (CASI), MiniCog, Mini-Mental State Examination, MOCA, St. Louis University Mental Status Examination (SLUMS) |

#### **Final search string for PubMed**

Setting 11 AND Intervention 19 AND Disease 4 AND Outcome 6

904

#### **Filters**

**Database:** Pubmed

**Access Date:** 04.10.2019

**Filters:**

**Article Type** included: Clinical trial, clinical study, controlled clinical trial, journal article, meta-analysis, multicentre study, observational study, randomized controlled trial, review, systematic review, validation study

**Language** selected: English & German,

**Age** included: 65+ years

**Findings before filters:** 954, **after:** 904

**Time range of findings:** 1972-2019

**Abbreviations:** MeSH = Medical Subject Headings, TW = Text words
