# Supplementary material for: Validity of screening instruments for the detection of dementia and mild cognitive impairment in hospital inpatients: A systematic review of diagnostic accuracy studies
Source: PubMed Central journal article supplement (PMC6657852; doi:10.1371/journal.pone.0219569), 2019-07-25
Supplement: pone.0219569.s002.pdf [file pone.0219569.s002.pdf]

## S3. Appendix

### Assessment of methodological quality using QUADAS-2

| Domain                                               | Participant Selection                                                                                                                                              | Index Test                                                                                                                                                       | Reference Standard                                                                                                                                                                             | Flow and Timing                                                                                                                                                                                                                                                       |
|------------------------------------------------------|--------------------------------------------------------------------------------------------------------------------------------------------------------------------|------------------------------------------------------------------------------------------------------------------------------------------------------------------|------------------------------------------------------------------------------------------------------------------------------------------------------------------------------------------------|-----------------------------------------------------------------------------------------------------------------------------------------------------------------------------------------------------------------------------------------------------------------------|
| Description                                          | Describe methods of participant selection: Describe included participants (prior testing, presentation, intended use of index test and setting)                    | Describe the index test and how it was conducted and interpreted                                                                                                 | Describe the reference standard and how it was conducted and interpreted                                                                                                                       | Describe any participants who did not receive the index test and or reference standard or who were excluded from the 2x2 table (refer to flow diagram): Describe the time interval and any interventions between index test and reference standard                    |
| Signaling questions (yes/no/unclear)                 | <p>Was a consecutive or random sample of participants enrolled?</p> <p>Was a case-control design avoided?</p> <p>Did the study avoid inappropriate exclusions?</p> | <p>Were the index test results interpreted without knowledge of the results of the reference standard?</p> <p>If a threshold was used, was it pre-specified?</p> | <p>Is the reference standard likely to correctly classify the target condition?</p> <p>Were the reference standard results interpreted without knowledge of the results of the index test?</p> | <p>Was there an appropriate interval between index test(s) and reference standard?</p> <p>Did all participants receive a reference standard?</p> <p>Did all participants receive the same reference standard?<br/>Were all participants included in the analysis?</p> |
| Risk of bias: (High/low/unclear)                     | Could the selection of participants have introduced bias?                                                                                                          | Could the conduct or interpretation of the index test have introduced bias?                                                                                      | Could the reference standard, its conduct, or its interpretation have introduced bias?                                                                                                         | Could the participant flow have introduced bias?                                                                                                                                                                                                                      |
| Concerns regarding applicability: (High/low/unclear) | Are there concerns that the included participants do not match the review question?                                                                                | Are there concerns that the index test, its conduct, or interpretation differ from the review question?                                                          | Are there concerns that the target condition as defined by the reference standard does not match the review question?                                                                          |                                                                                                                                                                                                                                                                       |
